# Supplementary material
Source: PubMed Central journal article supplement (PMC7242921)
Supplement: mmc1.pdf [file mmc1.pdf]

**Cell, Volume 182**

## **Supplemental Information**

### **Structural Basis for RNA Replication**

#### **by the SARS-CoV-2 Polymerase**

**Quan Wang, Jiqin Wu, Haofeng Wang, Yan Gao, Qiaojie Liu, An Mu, Wenxin Ji, Liming Yan, Yan Zhu, Chen Zhu, Xiang Fang, Xiaobao Yang, Yucen Huang, Hailong Gao, Fengjiang Liu, Ji Ge, Qianqian Sun, Xiuna Yang, Wenqing Xu, Zhijie Liu, Haitao Yang, Zhiyong Lou, Biao Jiang, Luke W. Guddat, Peng Gong, and Zihe Rao**

| Number | Constructs | Oligonucleotide sequences                      |
|--------|------------|------------------------------------------------|
| 1      | T33-1/P10  | GGGAGAUGAAAGUCUCCA <b>CCUGUG</b> UCGUCGAAA     |
| 2      | T33-2/P10  | GGGAGAUGAAAGUCUCCA <b>GCAUAU</b> UCGUCGAAA     |
| 3      | T33-3/P10  | GGGAGAUGAAAGUCUCCA <b>CCGGG</b> GUCGUCGAAA     |
| 4      | T33-4/P10  | GGGAGAUGAAAGUCUCCA <b>CCGUGU</b> UCGUCGAAA     |
| 5      | T33-5/P10  | GGGAGAUGAAAGUCUCCA <b>CCUUUU</b> UCGUCGAAA     |
| 6      | T33-6/P10  | GGGAGAUGAAAGUCUCCA <b>GGUCUC</b> UCGUCGAAA     |
| 7      | T31/P8     | GGGAGAUGAAAGUCUCCA <b>GGUCUC</b> GUGGAAA       |
| 8      | T34/P10    | GGGAGAUGAAAGUCUCCA <b>GGCUCUC</b> UCGUCGAAA    |
| 9      | T35/P10    | GGGAGAUGAAAGUCUCCA <b>GGUCUCUC</b> UCGUCGAAA   |
| 10     | T36/P10    | GGGAGAUGAAAGUCUCCA <b>GGCUCUCUC</b> UCGUCGAAA  |
| 11     | T37/P10    | GGGAGAUGAAAGUCUCCA <b>GGUCUCUCUC</b> UCGUCGAAA |
| 12     | T33-7/P10  | GGGAGAUGAAAGUCUCCA <b>GGUCUCUCUC</b> UCGUCGAAA |
| N/A    | P10        | UGUUCGACGA                                     |
| N/A    | P8         | UGUCCGA                                        |

**Table S1. Oligonucleotide sequences information, Related to STAR Methods.**

|                                                     | Pre-translocated catalytic complex |                |                 | Post-translocated catalytic complex |
|-----------------------------------------------------|------------------------------------|----------------|-----------------|-------------------------------------|
|                                                     | Overall                            | Conformation I | Conformation II |                                     |
| <b>PDB entry</b>                                    | 7C2K                               | N/A            | N/A             | 7BZF                                |
| <b>EMDB entry</b>                                   | EMD-30275                          | EMD-30283      | EMD-30284       | EMD-30252                           |
| <b>Data collection and processing</b>               |                                    |                |                 |                                     |
| Magnification                                       | 165,000                            | 165,000        | 165,000         | 165,000                             |
| Voltage (keV)                                       | 300                                | 300            | 300             | 300                                 |
| Electron exposure (e <sup>-</sup> /Å <sup>2</sup> ) | 60.00                              | 60.00          | 60.00           | 60.00                               |
| Defocus range (μm)                                  | -2.0 to -1.0                       | -2.0 to -1.0   | -2.0 to -1.0    | -1.8 to -1.0                        |
| Pixel size (Å)                                      | 0.82                               | 0.82           | 0.82            | 0.82                                |
| Symmetry imposed                                    | C1                                 | C1             | C1              | C1                                  |
| Initial particle images (no.)                       | 1,330,896                          | 1,330,896      | 1,330,896       | 1,235,162                           |
| Final particle images (no.)                         | 103,159                            | 65,463         | 37,696          | 119,662                             |
| Map global resolution (Å)                           | 2.93                               | 3.03           | 3.12            | 3.26                                |
| Global resolution FSC threshold                     | 0.143                              | 0.143          | 0.143           | 0.143                               |
| Map sharpening <i>B</i> factor (Å <sup>2</sup> )    | 97.6                               | 86.1           | 76.4            | 99.0                                |
| Map local resolution range (Å)                      | 1.8-7.5                            | 1.8-10.0       | 1.8-10.0        | 2.0-8.0                             |
| Model resolution (Å)                                | 2.8                                | N/A            | N/A             | 3.2                                 |
| FSC threshold                                       | 0.143                              | N/A            | N/A             | 0.143                               |
| Model resolution range (Å)                          | ∞ to 2.8                           | N/A            | N/A             | ∞ to 3.2                            |
| <b>Model composition</b>                            |                                    |                |                 |                                     |
| Non-hydrogen atoms                                  | 10,692                             | N/A            | N/A             | 9,932                               |
| Protein residues                                    | 1,256                              | N/A            | N/A             | 1,200                               |
| Nucleotide residues                                 | 31                                 | N/A            | N/A             | 19                                  |
| Ligands                                             | 3                                  | N/A            | N/A             | 2                                   |
| <b><i>B</i> factors (Å<sup>2</sup>)</b>             |                                    |                |                 |                                     |
| Protein                                             | 45.91                              | N/A            | N/A             | 51.33                               |
| Nucleotide                                          | 78.99                              | N/A            | N/A             | 74.57                               |
| Ligand                                              | 22.30                              | N/A            | N/A             | 42.29                               |
| <b>R.m.s. deviations</b>                            |                                    |                |                 |                                     |
| Bond lengths (Å)                                    | 0.005                              | N/A            | N/A             | 0.004                               |
| Bond angles (°)                                     | 0.645                              | N/A            | N/A             | 0.988                               |
| CC(mask)                                            | 0.90                               | N/A            | N/A             | 0.78                                |
| CC(box)                                             | 0.79                               | N/A            | N/A             | 0.73                                |
| <b>Validation</b>                                   |                                    |                |                 |                                     |
| MolProbity score                                    | 1.71                               | N/A            | N/A             | 2.09                                |
| Clashscore                                          | 7.25                               | N/A            | N/A             | 11.67                               |
| Poor rotamers (%)                                   | 0.00                               | N/A            | N/A             | 0.00                                |
| <b>Ramachandran plot</b>                            |                                    |                |                 |                                     |
| Favored (%)                                         | 95.51                              | N/A            | N/A             | 91.50                               |
| Allowed (%)                                         | 4.49                               | N/A            | N/A             | 8.50                                |
| Disallowed (%)                                      | 0.00                               | N/A            | N/A             | 0.00                                |
| <b>Model coverage</b>                               |                                    |                |                 |                                     |
| Chain A                                             | A1~V907;<br>D910~T929              | N/A            | N/A             | A1~T896;<br>T912~T929               |
| Chain B                                             | S76~N192                           | N/A            | N/A             | K72~N192                            |
| Chain C                                             | P0~C72                             | N/A            | N/A             | S1~I68                              |
| Chain D                                             | A53~A191                           | N/A            | N/A             | K127~A191                           |

**Table S2. Cryo-EM data statistics, Related to Figures 2, 3, 4, 5 and 7.**
